# Supplementary material
Source: MDPI journal article supplement (https://www.mdpi.com/2624-8549/4/4/76)
Supplement: s1 [file s1]

# Conformational preference of flavonols and its effect on the chemical properties involved in radical scavenging activity

Hiroko X. Kondo and Yu Takano

**Table S1.** The Gibbs energies and dihedral angles of C3-C2-C1'-C2' after the geometry optimization using DFT in gas phase for each conformer. Values of  $G^\circ$  and  $\omega_{\text{C3-C2-C1'-C2}}$  are shown in a.u. and degree, respectively.

| Conf. index | Myricetin                 |                                | Quercetin                 |                                | Kaempferol   |                                |
|-------------|---------------------------|--------------------------------|---------------------------|--------------------------------|--------------|--------------------------------|
|             | $G^\circ$                 | $\omega_{\text{C3-C2-C1'-C2}}$ | $G^\circ$                 | $\omega_{\text{C3-C2-C1'-C2}}$ | $G^\circ$    | $\omega_{\text{C3-C2-C1'-C2}}$ |
| i           | -1179.141206 <sup>a</sup> | 0.1                            | -1103.918622              | -3.8                           | -1028.694043 | -10.9                          |
| ii          | -1179.139359 <sup>b</sup> | 11.1                           | -1103.917549 <sup>d</sup> | 171.8                          | -1028.694246 | 9.4                            |
| iii         | -1179.140819 <sup>c</sup> | 0.0                            | -1103.916189              | 167.6                          | -1028.693322 | 13.2                           |
| iv          | -1179.138633              | -13.3                          | -1103.918066              | 4.9                            | -1028.693422 | 13.9                           |
| v           | -1179.141212 <sup>a</sup> | 0.0                            | -1103.916343              | 168.1                          | -1028.681395 | 42.5                           |
| vi          | -1179.139347 <sup>b</sup> | -10.9                          | -1103.917595 <sup>d</sup> | -172.0                         | -1028.681421 | -41.3                          |
| vii         | -1179.140809 <sup>c</sup> | 0.0                            | -1103.919201              | -1.2                           | -1028.680530 | 43.3                           |
| viii        | -1179.139347 <sup>b</sup> | -10.9                          | -1103.904703              | 139.6                          | -1028.677158 | 9.3                            |
| ix          | -1179.133063              | 13.9                           | -1103.904691              | 41.7                           | -1028.676955 | 8.5                            |
| x           | -1179.127419              | -41.2                          | -1103.911769              | 0.5                            | -1028.677241 | -5.1                           |
| xi          | -1179.127093              | 40.6                           | -1103.904202              | 138.3                          | -1028.676329 | 5.0                            |
| xii         | -1179.126584              | 40.8                           | -1103.910301              | 170.0                          | -1028.676153 | 0.0                            |
| xiii        | -1179.124135              | 0.0                            | -1103.902388              | -0.1                           | -1028.691212 | 0.0                            |
| xiv         | -1179.135137              | -0.1                           | -1103.909479              | 167.7                          | -1028.679585 | 0.0                            |
| xv          | -1179.135372              | -0.1                           | -1103.901001              | 0.0                            | -            | -                              |
| xvi         | -1179.123018              | 0.1                            | -1103.899990              | 170.0                          | -            | -                              |
| xvii        | -1179.131112              | 0.0                            | -1103.897821              | 179.5                          | -            | -                              |
| xviii       | -1179.122280              | -11.2                          | -1103.900187              | 180.0                          | -            | -                              |
| xix         | -1179.121734              | -8.1                           | -1103.914025              | 180.0                          | -            | -                              |
| xx          | -1179.120947              | 40.7                           | -1103.901657              | 0.0                            | -            | -                              |
| xxi         | -1179.124134              | -0.1                           | -1103.889105              | 180.0                          | -            | -                              |
| xxii        | -1179.117371              | -10.3                          | -1103.890822              | 180.0                          | -            | -                              |
| xxiii       | -1179.116014              | -9.5                           | -1103.897452              | 180.0                          | -            | -                              |
| xxiv        | -1179.119621              | 0.0                            | -                         | -                              | -            | -                              |
| xxv         | -1179.108097              | 0.0                            | -                         | -                              | -            | -                              |

<sup>a</sup> The optimized structures were identical to each other. <sup>b</sup> The optimized structures were identical to each other. <sup>c</sup> The optimized structures were identical to each other. <sup>d</sup> The optimized structures were identical to each other.

**Table S2.** The Gibbs energies and dihedral angles of C3-C2-C1'-C2' after the geometry optimization using DFT in water solvent for each conformer. Values of  $G^0$  and  $\omega_{\text{C3-C2-C1'-C2}}$  are shown in a.u. and degree, respectively.

| Conf. index | Myricetin    |                                | Quercetin                 |                                | Kaempferol   |                                |
|-------------|--------------|--------------------------------|---------------------------|--------------------------------|--------------|--------------------------------|
|             | $G^0$        | $\omega_{\text{C3-C2-C1'-C2}}$ | $G^0$                     | $\omega_{\text{C3-C2-C1'-C2}}$ | $G^0$        | $\omega_{\text{C3-C2-C1'-C2}}$ |
| i           | -1179.175764 | 27.0                           | -1103.950163              | -27.8                          | -1028.722257 | -29.5                          |
| ii          | -1179.175238 | 26.6                           | -1103.948744 <sup>a</sup> | 153.5                          | -1028.722241 | 31.0                           |
| iii         | -1179.176521 | 27.0                           | -1103.948951              | 151.5                          | -1028.721852 | 29.9                           |
| iv          | -1179.175851 | -25.4                          | -1103.949448              | 26.6                           | -1028.721931 | 30.6                           |
| v           | -1179.171763 | 27.9                           | -1103.948907              | 152.8                          | -1028.718234 | 43.5                           |
| vi          | -1179.172057 | 28.9                           | -1103.948729 <sup>a</sup> | 153.5                          | -1028.718523 | -42.4                          |
| vii         | -1179.172056 | -28.3                          | -1103.942633              | 28.2                           | -1028.718073 | 43.1                           |
| viii        | -1179.168647 | 28.9                           | -1103.945780              | 137.9                          | -1028.713509 | 28.1                           |
| ix          | -1179.168687 | 28.8                           | -1103.944940              | 43.2                           | -1028.713593 | 29.6                           |
| x           | -1179.172109 | -43.0                          | -1103.947884              | 27.4                           | -1028.713567 | -28.3                          |
| xi          | -1179.171116 | 42.2                           | -1103.946045              | 137.7                          | -1028.713628 | 29.8                           |
| xii         | -1179.171544 | 42.3                           | -1103.947952              | 153.0                          | -1028.713046 | 0.0                            |
| xiii        | -1179.170092 | -26.1                          | -1103.939833              | 24.7                           | -1028.721474 | 0.0                            |
| xiv         | -1179.174676 | 25.7                           | -1103.948073              | 152.3                          | -1028.713322 | 0.0                            |
| xv          | -1179.170875 | -26.1                          | -1103.939815              | 25.6                           | -1028.713172 | 0.0                            |
| xvi         | -1179.169735 | 26.1                           | -1103.939927              | 152.7                          | -            | -                              |
| xvii        | -1179.175505 | 25.4                           | -1103.940001              | 153.3                          | -            | -                              |
| xviii       | -1179.169511 | -25.1                          | -1103.939831              | 180.0                          | -            | -                              |
| xix         | -1179.169049 | -25.7                          | -1103.945667              | 180.0                          | -            | -                              |
| xx          | -1179.170523 | 43.9                           | -1103.939787              | 0.0                            | -            | -                              |
| xxi         | -1179.166739 | -27.1                          | -1103.935442              | 180.0                          | -            | -                              |
| xxii        | -1179.163008 | -28.0                          | -1103.939073              | 180.0                          | -            | -                              |
| xxiii       | -1179.166033 | -28.2                          | -1103.939846              | 180.0                          | -            | -                              |
| xxiv        | -1179.165956 | 0.0                            | -                         | -                              | -            | -                              |
| xxv         | -1179.161311 | 0.0                            | -                         | -                              | -            | -                              |

<sup>a</sup> The optimized structures were identical to each other.

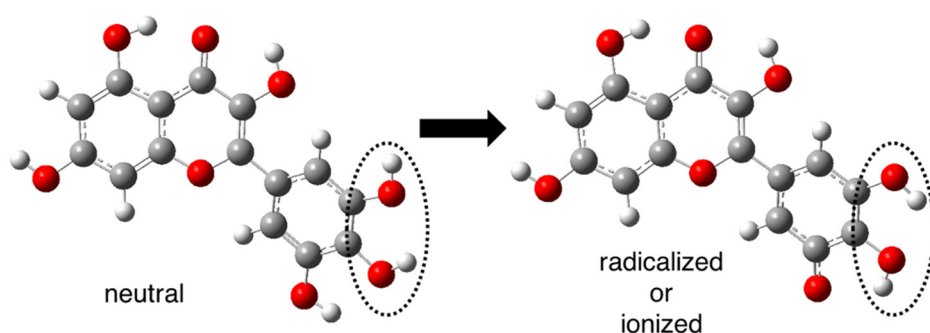

**Figure S1.** Change of orientation of hydrogen atoms upon radicalization or ionization as exemplified by the first conformer of myricetin.

**Table S3.** Dihedral angles of C3-C2-C1'-C2' of the neutral molecule and radical cation after the geometry optimization in water solvent. Values of  $\alpha_{\text{C3-C2-C1'-C2'}}$  are shown in degree.

| Conf. index | Myricetin |                | Quercetin |                | Kaempferol |                |
|-------------|-----------|----------------|-----------|----------------|------------|----------------|
|             | Neutral   | Radical cation | Neutral   | Radical cation | Neutral    | Radical cation |
| w-1         | 27.0      | 7.0            | -27.9     | -7.9           | -29.4      | -7.2           |
| w-2         | -25.4     | -13.7          | 26.5      | 2.1            | 31.0       | 10.0           |
| w-3         | 27.0      | 8.1            | 151.4     | 167.8          | 30.7       | 10.2           |
| w-4         | 25.4      | 6.3            | 152.9     | 166.4          | 29.8       | 11.6           |
| w-5         | 26.6      | 14.3           | 153.4     | 166.9          | -          | -              |
| w-6         | 25.7      | 6.5            | 152.3     | 167.2          | -          | -              |
| w-7         | -         | -              | 153.0     | 167.6          | -          | -              |
| w-8         | -         | -              | 27.4      | 9.2            | -          | -              |
